# Supplementary material for: Changes in the Epidemiology of Hepatocellular Carcinoma in Carinthia, Austria, 2012–2023
Source: MDPI journal article supplement (doi:10.3390/cancers15215215), 2023-10-30
Supplement: s1 [file s1]

**Supplementary Table S1.** ALBI Score Grading for various BCLC Stages

|      |   | ALBI-Score |           |           | P value |
|------|---|------------|-----------|-----------|---------|
|      |   | Grade 1    | Grade 2   | Grade 3   |         |
|      |   | N (%)      | N (%)     | N (%)     |         |
| BCLC | 1 | 46 (41.8)  | 59 (53.6) | 5 (4.5)   | <0.001  |
|      | 2 | 18 (30.5)  | 34 (57.6) | 7 (11.9)  |         |
|      | 3 | 19 (27.5)  | 45 (65.2) | 5 (7.2)   |         |
|      | 4 | 0 (0)      | 10 (30.3) | 23 (69.7) |         |

Abbreviations: ALBI Albumin-Bilirubin-Score; BCLC Barcelona Clinic Liver Cancer

**Supplementary Table S2.** Survival time of patients in time-period 1 vs. time-period 2 including OLT

|                 |              | Overall survival TP 1<br>(months) |        |           | Overall survival TP 2<br>(months) |        |           | P value<br>(log rank) |
|-----------------|--------------|-----------------------------------|--------|-----------|-----------------------------------|--------|-----------|-----------------------|
| Variable        |              | N=128                             | Median | 95% CI    | N=148                             | Median | 95% CI    |                       |
| Age             | <70          | 42                                | 14.3   | 8.6–20.0  | 62                                | 20.7   | 10.8–30.7 | 0.176                 |
|                 | ≥70          | 86                                | 24.2   | 19.5–28.8 | 86                                | 19.8   | 15.0–24.6 |                       |
| Sex             | male         | 109                               | 22.4   | 17.0–27.7 | 127                               | 20.1   | 15.6–24.7 | 0.841                 |
|                 | female       | 19                                | 12.4   | 4.3–20.4  | 21                                | 18.1   | 11.4–24.7 |                       |
| Liver cirrhosis | Present      | 106                               | 21.6   | 15.5–27.7 | 101                               | 20.2   | 7.5–65.9  | 0.279                 |
|                 | Absent       | 22                                | 22.0   | 8.7–35.4  | 47                                | 36.7   | 16.0–24.3 |                       |
| Etiology        | Alcohol      | 69                                | 18.9   | 11.5–26.3 | 70                                | 18.0   | 13.8–22.3 | 0.004                 |
|                 | Viral        | 28                                | 27.0   | 9.2–44.8  | 27                                | 53.3   | 19.4–87.2 |                       |
|                 | NASH         | 15                                | 26.2   | 4.8–47.7  | 28                                |        |           |                       |
|                 | Other        | 6                                 | 21.9   | 16.8–27.0 | 7                                 | 14.1   | 0.0–39.5  |                       |
| Ascites         | Present      | 28                                | 5.4    | 0.0–11.7  | 41                                | 11.8   | 1.5–22.1  | <0.001                |
|                 | Absent       | 98                                | 24.2   | 19.7–28.7 | 106                               | 27.8   | 11.5–44.1 |                       |
| Child-Pugh      | No cirrhosis | 22                                | 22.0   | 8.7–35.4  | 47                                | 36.7   | 7.5–65.9  | <0.001                |
|                 | A            | 55                                | 28.7   | 19.8–37.6 | 61                                | 27.0   | 12.8–41.3 |                       |
|                 | B            | 38                                | 15.2   | 9.3–21.0  | 27                                | 11.8   | 0.9–22.7  |                       |
|                 | C            | 13                                | 1.8    | 0.0–3.6   | 13                                | 5.6    | 0.0–13.7  |                       |
| BCLC            | A            | 53                                | 33.1   | 11.2–55.1 | 59                                | 52.8   | 20.1–85.5 | <0.001                |
|                 | B            | 32                                | 24.2   | 12.1–36.2 | 29                                | 27.0   | 6.5–47.6  |                       |
|                 | C            | 23                                | 10.4   | 5.9–15.0  | 46                                | 10.0   | 6.1–13.9  |                       |
|                 | D            | 20                                | 1.8    | 0.9–2.6   | 14                                | 1.9    | 0.0–6.1   |                       |
| Focality        | Unifocal     | 55                                | 22.0   | 15.4–28.6 | 72                                | 52.8   | 20.6–85.0 | 0.002                 |
|                 | Multifocal   | 73                                | 21.9   | 16.0–27.8 | 76                                | 12.8   | 8.9–16.6  |                       |
| Up-to-seven     | ≤7           | 65                                | 28.5   | 14.9–42.1 | 76                                | 34.6   | 7.7–61.4  | <0.001                |
|                 | >7           | 62                                | 12.9   | 8.5–17.2  | 72                                | 11.0   | 8.3–13.8  |                       |
| SBL             | Present      | 120                               | 22.2   | 18.0–26.4 | 16                                | 10.5   | 5.7–15.2  | <0.001                |
|                 | Absent       | 7                                 | 2.2    | 1.7–2.7   | 132                               | 21.2   | 12.5–29.9 |                       |
| MVI             | Present      | 105                               | 24.2   | 19.6–28.7 | 36                                | 4.8    | 3.2–6.4   | <0.001                |
|                 | Absent       | 22                                | 7.4    | 2.1–12.7  | 112                               | 30.6   | 16.5–44.6 |                       |

|                    |               |     |      |           |     |      |           |        |
|--------------------|---------------|-----|------|-----------|-----|------|-----------|--------|
| Ln. >2cm           | Present       | 23  | 12.6 | 8.6–29.3  | 18  | 4.8  | 2.2–7.4   | <0.001 |
|                    | Absent        | 103 | 22.7 | 16.5–29.0 | 127 | 27.0 | 16.5–37.6 |        |
| CRP                | Raised        | 58  | 12.1 | 7.2–16.9  | 62  | 11.2 | 7.7–65.7  | <0.001 |
|                    | Normal        | 67  | 33.1 | 20.1–46.2 | 85  | 36.7 | 7.0–15.3  |        |
| CAD                | Present       | 13  | 19.4 | 4.1–34.6  | 21  | 16.0 | 15.9–24.4 | 0.454  |
|                    | Absent        | 112 | 21.9 | 16.6–27.1 | 127 | 20.1 |           |        |
| CKD                | Present       | 10  | 14.3 | 12.2–16.4 | 19  | 42.8 | 0.0–86.0  | 0.299  |
|                    | Absent        | 115 | 22.0 | 17.6–26.5 | 128 | 20.2 | 16.0–24.3 |        |
| Hypertension       | Present       | 80  | 24.0 | 17.5–30.5 | 87  | 18.1 | 12.9–23.3 | 0.866  |
|                    | Absent        | 45  | 18.2 | 9.6–26.9  | 61  | 21.2 | 8.9–33.4  |        |
| DM                 | Present       | 38  | 18.9 | 8.7–29.1  | 50  | 20.5 | 9.0–31.9  | 0.610  |
|                    | Absent        | 90  | 22.2 | 15.4–29.0 | 98  | 18.7 | 13.3–24.1 |        |
| BMI                | <25           | 28  | 18.9 | 3.4–34.4  | 47  | 19.8 | 9.3–30.3  | 0.674  |
|                    | ≥25           | 77  | 25.4 | 18.2–32.6 | 91  | 20.5 | 9.1–31.8  |        |
| AFP                | Raised (>7)   | 76  | 15.2 | 9.6–20.7  | 80  | 14.1 | 9.8–18.3  | <0.001 |
|                    | Normal        | 49  | 33.2 | 21.3–45.1 | 67  | 34.6 | 5.3–63.8  |        |
| ALBI score         | Grade 1       | 18  | 33.2 | 9.8–56.6  | 65  | 34.6 | 26.4–42.7 | <0.001 |
|                    | Grade 2       | 81  | 22.0 | 15.7–28.4 | 67  | 15.8 | 11.5–20.1 |        |
|                    | Grade 3       | 24  | 7.6  | 0.0–19.0  | 16  | 3.9  | 0.8–6.9   |        |
| First-line therapy | Surgical/ OLT | 21  | 63.2 | 36.0–90.4 | 21  |      |           | <0.001 |
|                    | RFA/ MWA      | 13  | 48.7 | 13.9–83.5 | 32  | 52.8 | 0.0–109.7 |        |
|                    | TACE          | 55  | 24.0 | 20.1–27.8 | 21  | 27.0 | 15.9–38.1 |        |
|                    | Systemic      | 16  | 12.6 | 8.7–16.4  | 59  | 11.8 | 8.8–14.8  |        |
|                    | None          | 23  | 2.1  | 1.3–2.8   | 15  | 1.9  | 0.4–3.4   |        |
| ASA                | Present       | 24  | 24.2 | 9.0–39.4  | 35  | 53.3 | 0.0–110.2 | 0.248  |
|                    | Absent        | 104 | 21.6 | 17.2–26.0 | 113 | 18.1 | 14.2–21.9 |        |

Abbreviations: BCLC, Barcelona-Clinic Liver-Cancer Staging, CRP, C-reactive protein, BMI, body mass index, AFP, alpha-fetoprotein, ALBI, albumin-bilirubin score, SBL, sclerotic bone lesions, ASA, acetylsalicylic acid, NASH, non-alcoholic steatosis hepatitis, MVI, microvascular invasion, Ln., lymphnode, CAD, coronary artery disease, CKD, chronic kidney disease, DM, diabetes mellitus
